# Supplementary material
Source: Springer Nature journal article supplement (https://www.springermedizin.de/resource/supplementary/13058_2010_2756_MOESM12_ESM.pdf/9702090)

**(A)**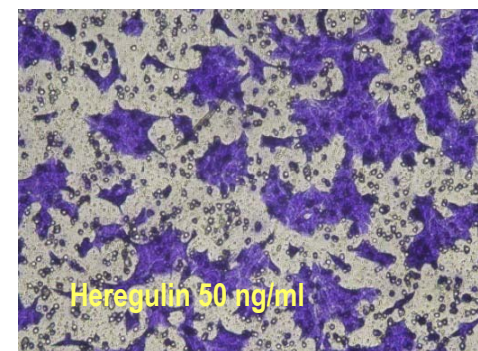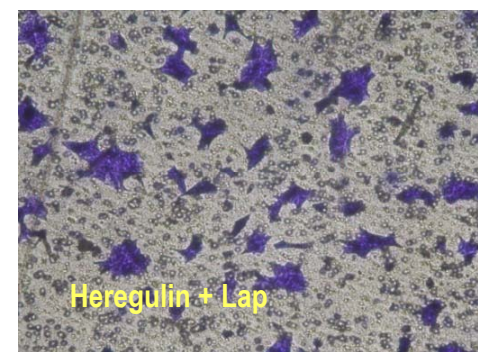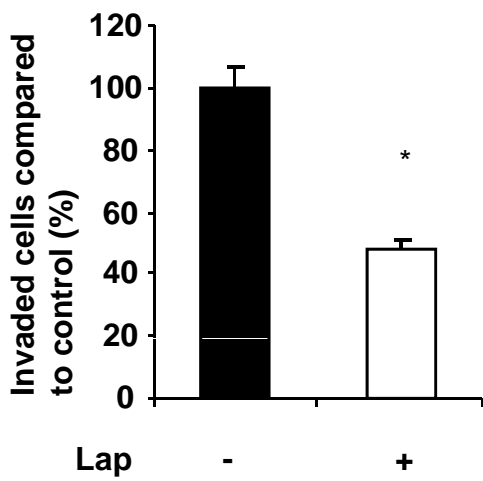**(B)**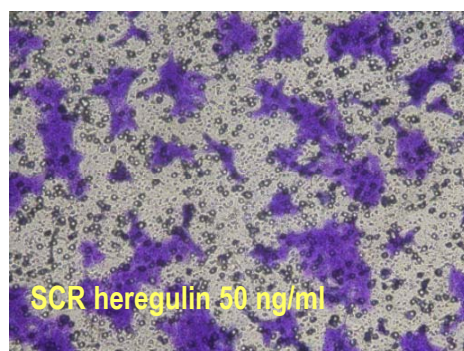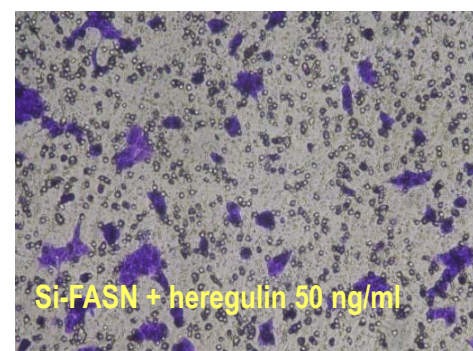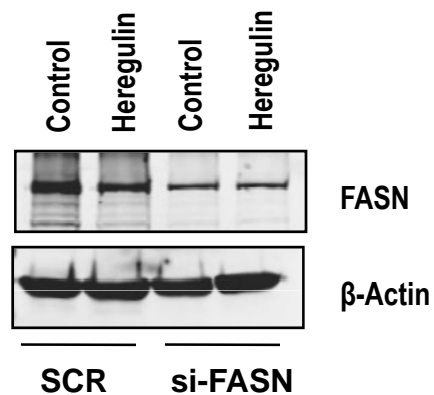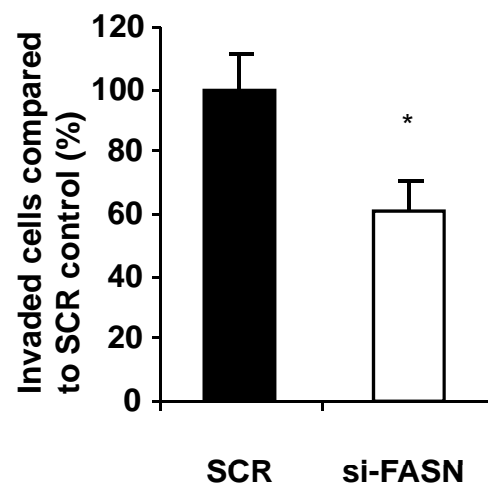

Supplement: MOESM12 [file 9702090]
